# Supplementary material
Source: HighWire-hosted journal article supplement (https://www.cmajopen.ca/content/suppl/2015/04/08/3.2.E140)
Supplement: open-2014-0101-original-submission.pdf [file open-2014-0101-original-submission.pdf]

# Declining Suicide Mortality among Persons living with HIV/AIDS who Initiated Highly Active Antiretroviral Therapy in British Columbia, Canada

Jasmine Gurm, BBA<sup>1</sup>  
Erin Ding, MSc<sup>1</sup>  
Verena Strehlau, MD<sup>3</sup>  
Julia Zhu, MEng<sup>1</sup>  
Julio S.G. Montaner, MD<sup>1,2</sup>  
Robert S. Hogg, PhD<sup>1,4</sup>  
Silvia Guillemi, MD<sup>1,2</sup>

1. BC Centre for Excellence in HIV/AIDS, St. Paul's Hospital, Vancouver, B.C, Canada
2. University of British Columbia, Faculty of Medicine, Vancouver, B.C, Canada
3. University of British Columbia, Department of Psychiatry, Vancouver, B.C, Canada
4. Simon Fraser University, Faculty of Health Sciences, Burnaby, B.C, Canada

## Corresponding Author:

Silvia Guillemi  
[squillemi@cfenet.ubc.ca](mailto:squillemi@cfenet.ubc.ca)

Email Address: [sguillemi@cfenet.ubc.ca](mailto:sguillemi@cfenet.ubc.ca)  
Contact Address:  
BC- CfE, St Paul's Hospital  
1081 Burrard St  
Vancouver  
V6Z 1Y6  
Canada

Phone: 604-806-8415  
Fax: 604-806-8412

**INTRODUCTION:**

Chronic illnesses in general, and HIV in particular, have long been associated with an increased risk of suicide<sup>1,2</sup>. The sense of hopelessness that can accompany the life-long implications of being HIV positive can contribute to compromised quality of life and significant mental distress<sup>3 4-8</sup>. With the prevalence of mental health disorders, namely depression, reported at greater rates among people living with HIV/AIDS (PLHIV) compared to the general population, it is not surprising that suicide rates within this population have been historically elevated<sup>2,9,3</sup>.

However, the advent of Highly Active Antiretroviral Therapy (HAART) transformed HIV from a terminal illness to a manageable chronic condition<sup>3</sup>. Effectively reducing the risk of developing potentially lethal AIDS-defining illnesses and opportunistic infections, HAART produced the potential for enhanced quality and longevity of life for persons living with HIV/AIDS (PLHIV)<sup>3,10 5,11,9,12-14</sup>. In light of these widespread benefits, it was anticipated that elevated rates of suicide among PLHIV could be favorably affected<sup>9,15,16</sup>.

Two recent studies have reported declines in suicide risk among PLHIV between the pre-HAART era (before 1996) and the HAART era (1996 onwards); however, the studies concluded that suicide risk<sup>5</sup> and suicide rates<sup>16</sup> remain substantially elevated among PLHIV at approximately 9 times and 2-3 times that of the general population, respectively<sup>5,16</sup>. This implies that despite effective HIV treatment an elevated propensity towards suicide persists, perhaps indicating that there are factors, other than issues

1  
2  
3 directly related to HIV infection<sup>7,16</sup>, that predispose PLHIV to  
4  
5 suicidality<sup>16,17,18</sup>.  
6

7 Identifying these factors is essential to deriving  
8  
9 meaningful targets for interventions that can effectively  
10  
11 mitigate suicide risk in this population<sup>1</sup>. We therefore conducted  
12  
13 the present analysis to characterize longitudinal suicide rates  
14  
15 and ascertain factors associated with suicide among PLHIV  
16  
17 accessing free HAART in the province of British Columbia, Canada.  
18  
19  
20  
21  
22  
23  
24  
25  
26  
27  
28  
29  
30  
31  
32  
33  
34  
35  
36  
37  
38  
39  
40  
41  
42  
43  
44  
45  
46  
47  
48  
49  
50  
51  
52  
53  
54  
55  
56  
57  
58  
59  
60

Confidential

**METHODS:*****Study Sample: HIV/AIDS Drug Treatment Program:***

HAART is provided free-of-charge to PLHIV in BC through the provincially funded Drug Treatment Program (DTP) at the BC Centre for Excellence in HIV/AIDS (BC - CfE). Individuals enrolled in the DTP who participated in the HOMER cohort - PLHIV who are over the age of 19, who initiated HAART from August 1996 to June 2012 - were eligible for inclusion in this study<sup>19</sup>. Socio-demographic and clinical data including HAART history as well as immunological and virological markers, were obtained through a linkage with the Drug Treatment Program. Cause and date of death were obtained through monthly linkages with the BC Vital Statistics event registry up to June 2012, and all deaths that occurred in this sample up to this time were included.

***Variable Selection:***

Our primary outcome variable was suicide as listed as the underlying cause of death on the vital statistics death record. The definition of suicide utilized in this study was adapted from the Manitoba Centre for Health Policy and includes several poisoning codes, such as "accidental poisoning", that account for ICD-10 codes suspected of capturing a significant proportion of suicides<sup>20</sup>. The following ICD - 10 codes from BC Vital Statistics were utilized in this definition: accidental poisoning: E850-E854, E858, E862, E868; X40-X42, X46, X47; poisoning with undetermined intent: Y10-Y12, Y16, Y17; self-inflicted poisoning: E950-E952, X60-X69; self-inflicted injury by hanging, strangulation and suffocation: E953, X70; self-inflicted injury

1  
2  
3 by drowning: E954, X71; self-inflicted injury by firearms and  
4 explosives: E955, X72-X75; self-inflicted injury by smoke, fire,  
5 flames, steam, hot vapors and hot objects: E958.1, E958.2; X76,  
6 X77; self-inflicted injury by cutting and piecing instruments:  
7 E956; codes X78, X79; self-inflicted injury by jumping from high  
8 places: E957, code X80; self-inflicted injury by jumping or lying  
9 before a moving object: code E958.0, code X81; self-inflicted  
10 injury by crashing of motor vehicle: code E958.5, X82; self-  
11 inflicted injury by other and unspecified means: E958.3, E958.4,  
12 E958.6-E958.9; X83, X84.  
13  
14  
15  
16  
17  
18  
19  
20  
21  
22  
23

24 The socio-demographic variables evaluated included: gender,  
25 Aboriginal identity (extracted from several sources including:  
26 surveys, physicians' reports, death information, etc.), median  
27 income (the median income recorded in census data for each  
28 patient's postal code was taken as the patient's median income),  
29 whether individuals were from urban versus rural neighborhoods  
30 (determined by postal code information held at the DTP), age at  
31 death and year of death. Clinical variables evaluated included:  
32 ever having been diagnosed with an AIDS-defining illness (ADI),  
33 ever having had a positive hepatitis C (HCV) diagnosis, HAART  
34 treatment adherence in the last year prior to death - calculated  
35 by number of days on therapy (based on number of days of coverage  
36 provided by a given prescription) divided by the number of days  
37 the patient is alive in the last year, last/most recent HAART  
38 regimen, Efavirenz as part of the last/most recent regimen,  
39 number of years on HAART, most recent and nadir CD4, and latest  
40 viral load. History of injection drug use was the only socio-  
41  
42  
43  
44  
45  
46  
47  
48  
49  
50  
51  
52  
53  
54  
55  
56  
57  
58  
59  
60

1  
2  
3 behavioral variable assessed.  
4

5 **Data Analysis & Statistical Methods:**  
6

7 Two main analyses were conducted in this study. We conducted the  
8 first analysis examining the predictors of suicide among all  
9 HOMER participants who committed suicide or remained alive over  
10 the study period, while the second analysis was limited to all  
11 deaths (suicides and non-suicides). Statistical comparisons were  
12 conducted using Pearson  $\chi^2$  test or Fisher's Exact Test for  
13 dichotomous variables and the Wilcoxon Rank-Sum test for  
14 continuous variables.  
15  
16  
17  
18  
19  
20  
21  
22  
23

24 A Cox Proportional Hazards model and logistic regression  
25 model were performed. The Cox analysis was used to identify the  
26 independent predictors of suicide among HOMER participants who  
27 remained alive or committed suicide during the study period. A  
28 logistic regression was used to identify independent predictors  
29 of suicide among suicides and non-suicides. Variables for  
30 inclusion in both Cox and logistic regression models were  
31 selected using exploratory model selection process based on  
32 Akaike Information Criterion (AIC) and Type III p-values.  
33  
34  
35  
36  
37  
38  
39  
40  
41  
42

43 Overall and annual rates of suicide mortality were estimated  
44 for HOMER and the general population from 1997 to 2011. These  
45 calculations were restricted to 1997 - 2011 to ensure full-year  
46 comparisons between HOMER participants and the BC general  
47 population. Person-years of risk in HOMER were based on  
48 participants' time under observation in the cohort, while for the  
49 BC population they were based on annual population estimates<sup>21,22</sup>.  
50  
51  
52  
53  
54  
55  
56  
57  
58  
59  
60  
61  
62  
63  
64  
65  
66  
67  
68  
69  
70  
71  
72  
73  
74  
75  
76  
77  
78  
79  
80  
81  
82  
83  
84  
85  
86  
87  
88  
89  
90  
91  
92  
93  
94  
95  
96  
97  
98  
99  
100

1  
2  
3 year, were obtained from BC Vital Statistics reports.<sup>15</sup> Crude  
4  
5 rates were expressed as deaths per 100,000 person years.  
6  
7  
8  
9  
10  
11  
12  
13  
14  
15  
16  
17  
18  
19  
20  
21  
22  
23  
24  
25  
26  
27  
28  
29  
30  
31  
32  
33  
34  
35  
36  
37  
38  
39

#### 40 **RESULTS :**

41  
42 Our analysis was based on 5,229 PLHIV in the HOMER cohort who  
43 initiated HAART from August 1996 to June 2012 in BC. A total of  
44 82 deaths from suicide were observed. Figure 1 highlights the  
45 decline in suicide rates over our study period from 961 deaths  
46 per 100,000 person-years in 1998 to 2.81 deaths per 100,000  
47 person years 2010 (the last year any suicides were recorded in  
48 this cohort), with a relatively constant suicide rate in the BC  
49 general population.  
50  
51  
52  
53  
54  
55  
56  
57  
58  
59  
60

1  
2  
3 The bivariate analysis in Table 1 describes the sample  
4 characteristics of all HOMER participants who committed suicide  
5 (n=82) compared to those who remained alive (n=4,236), while  
6 excluding those who died of causes other than suicide (n = 911).  
7  
8 As noted in Table 1, 78% of all suicides were male, the median  
9 age was 42 years and the median number of years on HAART was  
10 three. Aboriginal ancestry, younger age, lower annual income and  
11 injection drug use were found to be associated with suicide.  
12  
13 Clinical predictors of suicide included: ever having received a  
14 positive HCV diagnosis, never having an AIDS defining illness,  
15 poor treatment adherence in the last/most recent calendar year,  
16 and lower CD4 and higher viral load in the last/most recent  
17 calendar year.  
18  
19

20 A second bivariate analysis (Table 2) was performed to  
21 compare suicide deaths (n=82) to non-suicide deaths (n=911).  
22 Here, younger age and death in an earlier calendar year were  
23 found to be associated with suicide. In addition, higher nadir  
24 CD4, baseline CD4 and most recent CD4 prior to death were  
25 associated with suicide. Never having had an AIDS defining  
26 illness and ever having had a positive HCV diagnosis were also  
27 significantly predictive of suicide.  
28  
29

30 Table 3, highlights the results of the Cox proportional  
31 hazards model. In this analysis, those who died of non-suicide  
32 deaths were censored. Never having had an AIDS defining illness  
33 (Adjusted Hazard Ratio [AHR] = 4.45; CI [1.62 - 12.25]) or having  
34 a history of injection drug use (AHR = 3.95; CI [1.99 - 7.86])  
35 was independently associated with an increased rate of suicide.  
36  
37  
38  
39  
40  
41  
42  
43  
44  
45  
46  
47  
48  
49  
50  
51  
52  
53  
54  
55  
56  
57  
58  
59  
60



1  
2  
3 This model also found a 51% reduction in the suicide rate per  
4  
5  
6 calendar year increase into the HAART era.

7  
8 Table 4 highlights results from the logistic regression  
9  
10 model comparing suicide to non-suicide deaths in HOMER. The  
11  
12 model indicated that never having an AIDS defining illness was  
13  
14 associated with nearly a seven-fold increase in the probability  
15  
16 of suicide (Adjusted Odds Ratio [AOR] = 6.63 95% CI [2.34 -  
17  
18 18.83]), while having a history of injection drug use was  
19  
20 associated with a two-fold increase in the likelihood of suicide  
21  
22 (AOR = 1.92 95% CI [0.87 - 4.28]). Death at an older age (AOR =  
23  
24 0.96 95% CI [0.94 -0.99]), or in a later calendar year (AOR =  
25  
26 0.85 95% CI [0.79 -0.91]) were both associated with decreased  
27  
28 odds of suicide. A higher last CD4 count was associated with an  
29  
30 increased likelihood of suicide (AOR = 1.21 95% CI [1.06 -1.38]).  
31

32 In light of recent findings showing associations between  
33  
34 suicide and specific ARVs, a distribution highlighting the  
35  
36 proportion of HOMER participants whose treatment regimens include  
37  
38 specific classes of ARVs is provided in Table 5.  
39  
40  
41  
42  
43  
44  
45  
46  
47  
48  
49  
50  
51  
52  
53  
54  
55  
56  
57  
58  
59  
60

**INTERPRETATION:**

Our results indicate that suicide rates among HIV infected individuals who have accessed highly active antiretroviral therapy have declined substantially since 1996. Suicide mortality decreased significantly with each calendar year during the HAART era, and was greater among those who never experienced advanced HIV disease in the form of an AIDS defining illness (ADI).

Consistent with previous research, injection drug use was independently associated with higher rates of suicide mortality

<sup>17,23</sup>.

Suicide rates declined from a peak of 961 deaths per 100,000 person-years in 1998 - a rate 91 times the rate in the general population, to 28 deaths per 100,000 person years at a rate three times that of the general population in 2010 (the last year any suicides were recorded in this cohort) (Figure 1). Several factors may have contributed to this decline. First, as the HAART era progressed, treatment regimens became simpler, more effective, less toxic and better tolerated,<sup>18,24</sup> thereby, potentially reducing treatment burden and impact on patients' quality of life. Secondly, initially characterized as a terminal illness - and therefore inherently associated with an elevated risk of suicide<sup>18,25</sup> - HAART transformed HIV into a chronic-manageable condition,<sup>9,24</sup> and as a result may have generated a renewed sense of HAART related hope and optimism. Lastly, public perception may have evolved over time, leading to greater social acceptance and less alienation of PLHIV; therefore, helping to mitigate suicide risk within this population.

1  
2  
3 Recent research has reported an association between  
4  
5 Efavirenz containing regimens and an increased risk of  
6  
7 suicidality<sup>26</sup>. We only detected an association between Efavirenz  
8  
9 and suicide in univariate results comparing those who died of  
10  
11 suicide to those who remained alive (Table 1 & 4). Moreover, we  
12  
13 did not find NNRTI containing HAART regimens (Table 1 & 2) in  
14  
15 general, or Efavirenz in particular, to be independently  
16  
17 predictive of suicide (Table 4). It is likely that our relatively  
18  
19 small number of suicides (n=82), and small proportion of  
20  
21 individuals prescribed Efavirenz in their most recent regimen  
22  
23 (n=7) limited our statistical power and ability to quantify a  
24  
25 true association. Moreover, the majority of suicides in HOMER  
26  
27 occurred in the earlier HAART era (between 1996 - 2004), a time  
28  
29 when Nevirapine was the primary NNRTI prescribed.  
30  
31

32 Conflicting results have been reported with respect to the  
33  
34 relationship between disease stage and suicide<sup>5,16,17,25,27,28</sup>. Several  
35  
36 studies report that advanced HIV disease is associated with a  
37  
38 greater likelihood of suicide<sup>6,18,29</sup>, while others report that  
39  
40 disease progression/symptomatic disease is not associated with an  
41  
42 increased risk of suicide<sup>17,18 30-32</sup>. Consistent with Marzuk et al.'s  
43  
44 finding that 70% of all autopsied suicides among HIV positive  
45  
46 individuals showed no signs of AIDS-related pathology<sup>17</sup> our  
47  
48 results also showed those who have never experienced an ADI are  
49  
50 more likely to commit suicide; thus, implying that relatively  
51  
52 "healthier" PLHIV are at greater risk of suicide. This is  
53  
54 reinforced by findings in Table 2 that show the median last CD4  
55  
56 among those who committed suicide was above the definitive value  
57  
58  
59  
60

1  
2  
3 of 200cells/mm<sup>3</sup> that characterizes disease progression to the  
4 stage of AIDS<sup>33</sup>. Within this group, it appears that those who  
5 committed suicide were physiologically healthier than those who  
6 died of all other causes. It is possible that individuals living  
7 with chronic illness may take their lives<sup>25</sup> out of the fear of  
8 becoming terminally ill, or becoming a burden to loved ones and  
9 losing dignity throughout this process<sup>9</sup>. Lastly, although those  
10 who died of suicide may have appeared to be healthier (i.e.  
11 higher CD4, no ADI), it is possible that psychologically  
12 speaking, they may not have been. Within this cohort, 77% of  
13 suicides were non-adherent to treatment in the year preceding  
14 their death. Compromised mental health is a widely-recognized  
15 mediator of treatment non-adherence among PLHIV<sup>34-36</sup>; and thus,  
16 this trend towards non-adherence could be indicative of  
17 underlying, and possibly undiagnosed, mental health illness.  
18  
19  
20  
21  
22  
23  
24  
25  
26  
27  
28  
29  
30  
31  
32  
33

34 Many PLHIV in British Columbia experience a host of  
35 psychosocial, behavioral and/or socio-economic challenges  
36 including poverty, homelessness, trauma, addictions and injection  
37 drug use. These psychosocial and socio-economic stressors that  
38 place individuals at an increased risk for HIV infection, are  
39 synonymous with those that place individuals at increased risk of  
40 suicide<sup>11,17,18,23,4,7,28</sup>. More specifically, previous studies have  
41 established injection drug use and substance use behaviors as  
42 strong correlates of elevated suicide risk/suicidality<sup>1,4,16-18,23,28,37</sup>.  
43 Within HOMER, 38% of participants have a history of injection  
44 drug use, a behavior known to often occur in the presence of  
45 concomitant mental health illness,<sup>38,39</sup>. It may be that  
46  
47  
48  
49  
50  
51  
52  
53  
54  
55  
56  
57  
58  
59  
60

1  
2  
3  
4  
5  
6  
7  
8  
9  
10  
11  
12  
13  
14  
15  
16  
17  
18  
19  
20  
21  
22  
23  
24  
25  
26  
27  
28  
29  
30  
31  
32  
33  
34  
35  
36  
37  
38  
39  
40  
41  
42  
43  
44  
45  
46  
47  
48  
49  
50  
51  
52  
53  
54  
55  
56  
57  
58  
59  
60

compromised mental health becomes neglected in the face of injection drug use, HIV infection and more visibly apparent health concerns; thus, contributing to exacerbation of suicide risk/suicidality<sup>16,18,40</sup>

Readers should be cautious when interpreting our results. First, our data pertains to a very specific population of PLHIV, who have initiated HAART in British Columbia, Canada - a universal healthcare setting with free access to treatment and HIV related care. Second, the lack of accepted methodology within this field of research - suicidality in HIV-positive populations, limits the comparability and generalizability of results across studies<sup>9,11, 1,41,42</sup>. Third, suicides may be under-estimated as those that occur in the form of drug overdoses or as a result of self-administered withdrawal of care, often cannot be distinguished as such; thus, the number of suicides may actually be higher than reported. Fourth, our sample size and gender distribution is limited and finally we had no access to clinical information regarding previous psychiatric history, particularly depression, or any mental health related treatments.

#### **CONCLUSION:**

Suicide rates among HIV infected individuals accessing antiretroviral therapy have declined substantially since 1996; however, in the most recent comparison, suicide rates in our cohort remained elevated at nearly three times the rate of the general population. Although the declines observed are promising, longer follow up will be required to ascertain whether these

1  
2  
3 trends are persistent. Finally, our results reinforce the need  
4  
5 for further integration of care, and proactive mental health  
6  
7 screening and treatment among individuals infected with HIV  
8  
9 infected individuals to identify suicidal risk.  
10  
11  
12  
13  
14  
15  
16  
17  
18  
19  
20  
21  
22  
23  
24  
25  
26  
27  
28  
29  
30  
31  
32  
33  
34  
35  
36  
37  
38  
39  
40  
41  
42  
43  
44  
45  
46  
47  
48  
49  
50  
51  
52  
53  
54  
55  
56  
57  
58  
59  
60

Confidential

**ACKNOWLEDGEMENTS :**

1  
2  
3  
4  
5  
6  
7  
8  
9  
10  
11  
12  
13  
14  
15  
16  
17  
18  
19  
20  
21  
22  
23  
24  
25  
26  
27  
28  
29  
30  
31  
32  
33  
34  
35  
36  
37  
38  
39  
40  
41  
42  
43  
44  
45  
46  
47  
48  
49  
50  
51  
52  
53  
54  
55  
56  
57  
58  
59  
60

Authors Erin Ding, MSc, and Julia Zhu, MEng, of the BC - CfE conducted the statistical modeling and data analysis for this study, respectively. We would also like to acknowledge Adriana Nophali, MSc, for her work in assisting with the statistical analyses for this study. Dr. Robert Hogg, Director of Epidemiology & Population Health at the BC - CfE and Dr. Silvia Guillemi, Director of the Clinical Education and Training program at the BC - CfE and Assistant Medical Director of the John Ruedy Immunodeficiency Clinic at St. Paul's Hospital, had full access to all of the data in the study and take responsibility for the integrity of the data and the accuracy of the data analysis. We would like to acknowledge the British Columbia Centre for Excellence (BC - CfE) team for their support in producing this work. We would like to acknowledge Dr. Hasina Samji, Epidemiologist at the BC - CfE, for her assistance in reviewing this manuscript. We would like to thank Mr. James Nakagawa, Communications Assistant at the BC - CfE for designing the figures presented in this paper. Lastly, we would like to acknowledge all the participants from the HOMER cohort who have enabled this research to take place by allowing their data to be collected and utilized for the purposes of advancing HIV/AIDS research.

**Disclosures:**

Dr. Julio Montaner is supported by the British Columbia Ministry of Health and by the US National Institutes of Health (R01DA036307). He has also received limited unrestricted funding from Abbvie, Bristol-Myers Squibb, Gilead Sciences, Janssen, Merck, and ViiV Healthcare. Dr. Silvia Guillemi is on the advisory boards/committees and does consultations with AbbVie, Bristol-Myers Squibb Canada, Gilead Sciences Canada Inc., Janssen Inc., Merck Canada Inc., ViiV Healthcare. Dr. Guillemi also participates in the speakers bureau for which she receives honoraria for the following: Bristol-Myers Squibb Canada, Gilead Sciences Canada Inc., ViiV Healthcare.

## References

1. Catalan J, Harding R, Sibley E, Clucas C, Croome N, Sherr L. HIV infection and mental health: suicidal behaviour--systematic review. *Psychol Health Med.* Oct 2011;16(5):588-611.
2. Marzuk PM, Tierney H, Tardiff K, et al. Increased risk of suicide in persons with AIDS. *JAMA : the journal of the American Medical Association.* Mar 4 1988;259(9):1333-1337.
3. Do AN, Rosenberg ES, Sullivan PS, et al. Excess Burden of Depression among HIV-Infected Persons Receiving Medical Care in the United States: Data from the Medical Monitoring Project and the Behavioral Risk Factor Surveillance System. *PLoS One.* 2014;9(3):e92842.
4. Quintana-Ortiz RA, Gomez MA, Baez Feliciano DV, Hunter-Mellado RF. Suicide attempts among Puerto Rican men and women with HIV/AIDS: a study of prevalence and risk factors. *Ethnicity & disease.* Spring 2008;18(2 Suppl 2):S2-219-224.
5. Jia CX, Mehlum L, Qin P. AIDS/HIV infection, comorbid psychiatric illness, and risk for subsequent suicide: a nationwide register linkage study. *The Journal of clinical psychiatry.* Oct 2012;73(10):1315-1321.
6. Kalichman SC, Heckman T, Kochman A, Sikkema K, Bergholte J. Depression and thoughts of suicide among middle-aged and older persons living with HIV-AIDS. *Psychiatric services.* Jul 2000;51(7):903-907.
7. Cooperman NA, Simoni JM. Suicidal ideation and attempted suicide among women living with HIV/AIDS. *Journal of behavioral medicine.* Apr 2005;28(2):149-156.
8. Schneider SG, Taylor SE, Hammen C, Kemeny ME, Dudley J. Factor influencing suicide intent in gay and bisexual suicide ideators: differing models for men with and without human immunodeficiency virus. *Journal of personality and social psychology.* Nov 1991;61(5):776-788.
9. Carrico AW. Elevated suicide rate among HIV-positive persons despite benefits of antiretroviral therapy: implications for a stress and coping model of suicide. *The American journal of psychiatry.* Feb 2010;167(2):117-119.
10. Samji H, Cescon A, Hogg RS, et al. Closing the Gap: Increases in Life Expectancy among Treated HIV-Positive Individuals in the United States and Canada. *PLoS One.* 2013;8(12):e81355.
11. Aldaz P, Moreno-Iribas C, Egues N, et al. Mortality by causes in HIV-infected adults: comparison with the general population. *BMC Public Health.* 2011;11:300.
12. Cote TR, Biggar RJ, Dannenberg AL. Risk of suicide among persons with AIDS. A national assessment. *JAMA : the journal of the American Medical Association.* Oct 21 1992;268(15):2066-2068.
13. Mocroft A, Brettle R, Kirk O, et al. Changes in the cause of death among HIV positive subjects across Europe: results from the EuroSIDA study. *Aids.* Aug 16 2002;16(12):1663-1671.
14. Montaner JS. 2014.
15. Sherr L, Lampe F, Fisher M, et al. Suicidal ideation in UK HIV clinic attenders. *Aids.* Aug 20 2008;22(13):1651-1658.



16. Keiser O, Spoerri A, Brinkhof MW, et al. Suicide in HIV-infected individuals and the general population in Switzerland, 1988-2008. *The American journal of psychiatry*. Feb 2010;167(2):143-150.
17. Marzuk PM, Tardiff K, Leon AC, et al. HIV seroprevalence among suicide victims in New York City, 1991-1993. *The American journal of psychiatry*. Dec 1997;154(12):1720-1725.
18. Komiti A, Judd F, Grech P, et al. Suicidal behaviour in people with HIV/AIDS: a review. *Aust N Z J Psychiatry*. Dec 2001;35(6):747-757.
19. Patterson S CA, Samji H, Cui Z, Yip B, Lepik KJ, Moore D, Lima VD, Nosyk B, Harrigan PR, Montaner JSG, Hogg RS. Cohort Profile: HAART Observational Medical Evaluation and Research (HOMER). *International Journal of Epidemiology*. Accepted for publication: 02/06/2014.
20. Policy. UoMMCfH. Concept: Suicide and Attempted Suicide (Intentional Self Inflicted Injury). 2013; <http://mchp-appserv.cpe.umanitoba.ca/viewConcept.php?conceptID=1183>, 2014.
21. Quarterly Digest. 1997-2011.
22. BC Quarterly Population Estimates. . 1997-2012.
23. Havens JR, Strathdee SA, Fuller CM, et al. Correlates of attempted suicide among young injection drug users in a multi-site cohort. *Drug Alcohol Depend*. Sep 6 2004;75(3):261-269.
24. Montaner JS, Wood E, Kerr T, et al. Expanded highly active antiretroviral therapy coverage among HIV-positive drug users to improve individual and public health outcomes. *J Acquir Immune Defic Syndr*. Dec 2010;55 Suppl 1:S5-9.
25. Pugh K, O'Donnell I, Catalan J. Suicide and HIV disease. *AIDS Care*. 1993;5(4):391-400.
26. Increased Suicidality in Patients Treated with Efavirenz-Containing Regimens in ACTG Clinical Trials. . Paper presented at: ICAAC, IDWeek and EACS 2013.
27. Gala C, Pergami A, Catalan J, et al. Risk of deliberate self-harm and factors associated with suicidal behaviour among asymptomatic individuals with human immunodeficiency virus infection. *Acta Psychiatr Scand*. Jul 1992;86(1):70-75.
28. Preau M, Bouhnik AD, Peretti-Watel P, Obadia Y, Spire B. Suicide attempts among people living with HIV in France. *AIDS Care*. Sep 2008;20(8):917-924.
29. Carvajal MJ, Vicioso C, Santamaria JM, Bosco A. AIDS and suicide issues in Spain. *AIDS Care*. 1995;7 Suppl 2:S135-138.
30. Sherr L. Suicide and AIDS: lessons from a case note audit in London. *AIDS Care*. 1995;7 Suppl 2:S109-116.
31. McKegney FP, O'Dowd MA. Suicidality and HIV status. *The American journal of psychiatry*. Mar 1992;149(3):396-398.
32. O'Dowd MA, Biderman DJ, McKegney FP. Incidence of suicidality in AIDS and HIV-positive patients attending a psychiatry outpatient program. *Psychosomatics*. Jan-Feb 1993;34(1):33-40.
33. Organization WH. HIV/AIDS Programme: Strengthening health services to fight HIV/AIDS - WHO Case Definitions of HIV for Surveillance and Revised Clinical Staging and Immunological Classification of HIV-Related Disease in Adults and Children 2007.

- 1
  - 2
  - 3
  - 4
  - 5
  - 6
  - 7
  - 8
  - 9
  - 10
  - 11
  - 12
  - 13
  - 14
  - 15
  - 16
  - 17
  - 18
  - 19
  - 20
  - 21
  - 22
  - 23
  - 24
  - 25
  - 26
  - 27
  - 28
  - 29
  - 30
  - 31
  - 32
  - 33
  - 34
  - 35
  - 36
  - 37
  - 38
  - 39
  - 40
  - 41
  - 42
  - 43
  - 44
  - 45
  - 46
  - 47
  - 48
  - 49
  - 50
  - 51
  - 52
  - 53
  - 54
  - 55
  - 56
  - 57
  - 58
  - 59
  - 60
34. Chander G, Himelhoch S, Moore RD. Substance abuse and psychiatric disorders in HIV-positive patients: epidemiology and impact on antiretroviral therapy. *Drugs*. 2006;66(6):769-789.
35. Horberg MA, Silverberg MJ, Hurley LB, et al. Effects of depression and selective serotonin reuptake inhibitor use on adherence to highly active antiretroviral therapy and on clinical outcomes in HIV-infected patients. *J Acquir Immune Defic Syndr*. Mar 1 2008;47(3):384-390.
36. Yun LW, Maravi M, Kobayashi JS, Barton PL, Davidson AJ. Antidepressant treatment improves adherence to antiretroviral therapy among depressed HIV-infected patients. *J Acquir Immune Defic Syndr*. Apr 1 2005;38(4):432-438.
37. Sarin E, Singh B, Samson L, Sweat M. Suicidal ideation and HIV risk behaviors among a cohort of injecting drug users in New Delhi, India. *Substance abuse treatment, prevention, and policy*. 2013;8:2.
38. Kelly B, Raphael B, Judd F, et al. Suicidal ideation, suicide attempts, and HIV infection. *Psychosomatics*. Sep-Oct 1998;39(5):405-415.
39. Gallego L, Barreiro P, Lopez-Ibor JJ. Diagnosis and clinical features of major neuropsychiatric disorders in HIV infection. *AIDS Rev*. Jul-Sep 2011;13(3):171-179.
40. Pompili M, Pennica A, Serafini G, et al. Depression and affective temperaments are associated with poor health-related quality of life in patients with HIV infection. *J Psychiatr Pract*. Mar 2013;19(2):109-117.
41. Badiie J, Moore DJ, Atkinson JH, et al. Lifetime suicidal ideation and attempt are common among HIV+ individuals. *Journal of affective disorders*. Feb 2012;136(3):993-999.
42. Bellini M BC. HIV Infection and Suicidality. *J Affect Disord*.38(2-3):153-164.

1  
2  
3  
4  
5  
6  
7  
8  
9  
10  
11  
12  
13  
14  
15  
16  
17  
18  
19  
20  
21  
22  
23  
24  
25  
26  
27  
28  
29  
30  
31  
32  
33  
34  
35  
36  
37  
38  
39  
40  
41  
42  
43  
44  
45  
46  
47  
48  
49  
50  
51  
52  
53  
54  
55  
56  
57  
58  
59  
60

Confidential

1  
2  
3  
4  
5  
6  
7  
8  
9  
10  
11  
12  
13  
14  
15  
16  
17  
18  
19  
20  
21  
22  
23  
24  
25  
26  
27  
28  
29  
30  
31  
32  
33  
34  
35  
36  
37  
38  
39  
40  
41  
42  
43  
44  
45  
46  
47  
48  
49  
50  
51  
52  
53  
54  
55  
56  
57  
58  
59  
60

**Figure 1:** Comparison of suicide rates in the HOMER cohort to the BC general population from 1997 - 2011

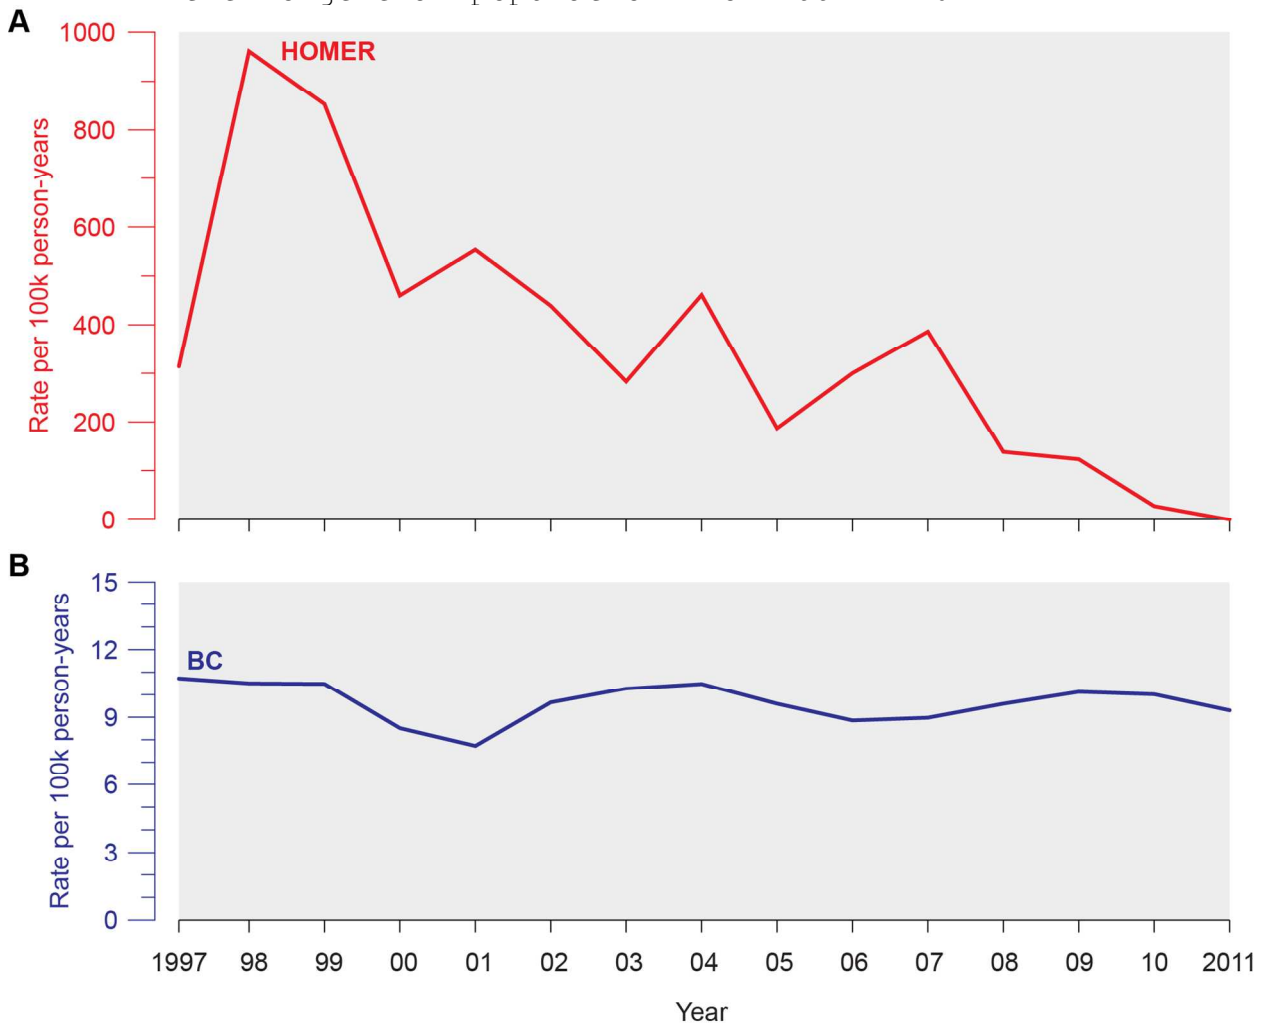

\*To ensure full-year comparisons this figure was restricted to the years 1997 - 2011. BC general population data was retrieved from BC Statistics and BC Vital Statistics Agency<sup>21,22</sup>.

**Table 1**

Comparison of characteristics of patients initiating HAART who died by suicide or remained alive

| Variable                                       | Suicide     | Alive         | <i>P</i> |
|------------------------------------------------|-------------|---------------|----------|
|                                                | <i>N=82</i> | <i>N=4236</i> |          |
|                                                | <i>n %</i>  |               |          |
| Gender                                         |             |               |          |
| Female                                         | 18(22)      | 773(18)       | 0.3876   |
| Male                                           | 64(78)      | 3463(82)      |          |
| Ethnicity                                      |             |               |          |
| Aboriginal                                     | 16(20)      | 473(11)       | 0.0133   |
| Non-Aboriginal                                 | 24(29)      | 1805(43)      |          |
| Unknown                                        | 42(51)      | 1958(46)      |          |
| Geographic region                              |             |               |          |
| Rural                                          | 2(2)        | 162(4)        | 0.8254   |
| Urban                                          | 64(78)      | 3327(79)      |          |
| Unknown                                        | 16(20)      | 747(18)       |          |
| Injection drug use history                     |             |               |          |
| Yes                                            | 47(57)      | 1535(36)      | <.0001   |
| No                                             | 10(12)      | 1973(47)      |          |
| Unknown                                        | 25(30)      | 728(17)       |          |
| ADI diagnosis                                  |             |               |          |
| Yes                                            | 4(5)        | 758(18)       | 0.0011   |
| No                                             | 78(95)      | 3478(82)      |          |
| Hepatitis C                                    |             |               |          |
| Yes                                            | 63(77)      | 1582(37)      | <.0001   |
| No                                             | 13(16)      | 2355(56)      |          |
| Unknown                                        | 6(7)        | 299(7)        |          |
| Most recent HAART regimen                      |             |               |          |
| Single PI                                      | 47(57)      | 2131(50)      | 0.0022   |
| Single NNRTI                                   | 30(37)      | 1717(41)      |          |
| Any IIN                                        |             | 299(7)        |          |
| OTHER                                          | 5(6)        | 89(2)         |          |
| Efavirenz included in last/most recent regimen |             |               |          |
| Yes                                            | 7(9)        | 1086(26)      | 0.0002   |
| No                                             | 75(91)      | 3150(74)      |          |
| Adherence                                      |             |               |          |

**Table 1**

Comparison of characteristics of patients initiating HAART who died by suicide or remained alive

| Variable                                                                                      | Suicide     | Alive         | <i>P</i> |
|-----------------------------------------------------------------------------------------------|-------------|---------------|----------|
|                                                                                               | <i>N=82</i> | <i>N=4236</i> |          |
|                                                                                               | <i>n %</i>  |               |          |
| >= 95%                                                                                        | 19(23)      | 2685(63)      | <.0001   |
| < 95%                                                                                         | 63(77)      | 1551(37)      |          |
| Age at the end of follow up <sup>1</sup>                                                      |             |               | <.0001   |
| Median                                                                                        | 42          | 47            |          |
| 25 <sup>th</sup> - 75 <sup>th</sup> percentile                                                | 38-49       | 41-54         |          |
| Year of death                                                                                 |             |               | <.0001   |
| Median                                                                                        | 2003        |               |          |
| 25 <sup>th</sup> - 75 <sup>th</sup> percentile                                                | 2000-2006   |               |          |
| Median Income(CAD) <sup>2</sup>                                                               |             |               | 0.0115   |
| Median                                                                                        | 21015       | 23406         |          |
| 25 <sup>th</sup> - 75 <sup>th</sup> percentile                                                | 14750-27799 | 18258.5-29901 |          |
| Baseline CD4+ cell count (cell/mm <sup>3</sup> )                                              |             |               | 0.0010   |
| Median                                                                                        | 290         | 220           |          |
| 25 <sup>th</sup> - 75 <sup>th</sup> percentile                                                | 170-400     | 325-670       |          |
| Most recent CD4+ cell count (cell/mm <sup>3</sup> ) before the end of follow up <sup>1</sup>  |             |               | <.0001   |
| Median                                                                                        | 355         | 490           |          |
| 25 <sup>th</sup> - 75 <sup>th</sup> percentile                                                | 200-500     | 325-670       |          |
| Nadir CD4+ cell count (cell/mm <sup>3</sup> )                                                 |             |               | 0.2155   |
| Median                                                                                        | 170         | 160           |          |
| 25 <sup>th</sup> - 75 <sup>th</sup> percentile                                                | 70-290      | 60-250        |          |
| Most recent viral load (log <sub>10</sub> copies/ml) before the end of follow up <sup>1</sup> |             |               | <.0001   |
| Median                                                                                        | 5           | 2.69          |          |
| 25 <sup>th</sup> - 75 <sup>th</sup> percentile                                                | 2.69-5      | 2.69-2.69     |          |
| Number of years on HAART                                                                      |             |               | <.0001   |
| Median                                                                                        | 3           | 6             |          |
| 25 <sup>th</sup> - 75 <sup>th</sup> percentile                                                | 2-6         | 3-10          |          |

1. End of follow up can be the death date, last contact date, last contact date prior to moving out of BC or to participating in ARV blinded trials.

2. Median Income was calculated with 945 missing values (17 Suicides and 928 alive).

1  
2  
3  
4  
5  
6  
7  
8  
9  
10  
11  
12  
13  
14  
15  
16  
17  
18  
19  
20  
21  
22  
23  
24  
25  
26  
27  
28  
29  
30  
31  
32  
33  
34  
35  
36  
37  
38  
39  
40  
41  
42  
43  
44  
45  
46  
47  
48  
49  
50  
51  
52  
53  
54  
55  
56  
57  
58  
59  
60

Confidential

**Table 2**

Comparison of characteristics of patients initiating HAART who committed suicide or died non-suicide deaths

| Variable                                  | Suicides     | Non-suicide deaths | <i>p</i> -value |
|-------------------------------------------|--------------|--------------------|-----------------|
|                                           | <i>N</i> =82 | <i>N</i> =911      |                 |
|                                           | <i>n</i> %   |                    |                 |
| Gender                                    |              |                    |                 |
| Female                                    | 18(22)       | 194(21)            | 0.8884          |
| Male                                      | 64(78)       | 717(79)            |                 |
| Ethnicity                                 |              |                    |                 |
| Aboriginal                                | 16(20)       | 195(21)            | 0.9419          |
| Non-Aboriginal                            | 24(29)       | 267(29)            |                 |
| Unknown                                   | 42(51)       | 449(49)            |                 |
| Geographic region                         |              |                    |                 |
| Rural                                     | 2(2)         | 42(5)              | 0.7486          |
| Urban                                     | 64(78)       | 699(77)            |                 |
| Unknown                                   | 16(20)       | 170(19)            |                 |
| Injection drug use history                |              |                    |                 |
| Yes                                       | 47(57)       | 449(49)            | 0.1148          |
| No                                        | 10(12)       | 196(22)            |                 |
| Unknown                                   | 25(30)       | 266(29)            |                 |
| ADI diagnoses                             |              |                    |                 |
| Yes                                       | 4(5)         | 296(32)            | <.0001          |
| No                                        | 78(95)       | 615(68)            |                 |
| Hepatitis C                               |              |                    |                 |
| Yes                                       | 63(77)       | 548(60)            | 0.0126          |
| No                                        | 13(16)       | 250(27)            |                 |
| Unknown                                   | 6(7)         | 113(12)            |                 |
| Last/most recent HAART regimen            |              |                    |                 |
| Single PI                                 | 47(57)       | 537(59)            | 0.4025          |
| Single NNRTI                              | 30(37)       | 281(31)            |                 |
| Any IIN                                   | 0(0)         | 25(3)              |                 |
| OTHER                                     | 5(6)         | 68(7)              |                 |
| Efavirenz included in last/latest regimen |              |                    |                 |
| Yes                                       | 7(9)         | 142(16)            | 0.1053          |
| No                                        | 75(91)       | 769(84)            |                 |
| Adherence                                 |              |                    |                 |
| >= 95%                                    | 19(23)       | 197(22)            | 0.7799          |



**Table 2**

Comparison of characteristics of patients initiating HAART who committed suicide or died non-suicide deaths

| Variable                                                                                           | Suicides    | Non-suicide deaths | <i>p-value</i> |
|----------------------------------------------------------------------------------------------------|-------------|--------------------|----------------|
|                                                                                                    | <i>N=82</i> | <i>N=911</i>       |                |
|                                                                                                    | <i>n %</i>  |                    |                |
| Age at death                                                                                       |             |                    |                |
| < 95%                                                                                              | 63(77)      | 714(78)            |                |
| Median                                                                                             | 42          | 46                 | 0.0005         |
| 25 <sup>th</sup> - 75 <sup>th</sup> percentile                                                     | 38-49       | 39-54              |                |
| Year of death                                                                                      |             |                    |                |
| Median                                                                                             | 2003        | 2006               | <.0001         |
| 25 <sup>th</sup> - 75 <sup>th</sup> percentile                                                     | 2000-2006   | 2002-2009          |                |
| Median Income (CAD) <sup>2</sup>                                                                   |             |                    | 0.6707         |
| Median                                                                                             | 21015       | 19346.5            |                |
| 25 <sup>th</sup> - 75 <sup>th</sup> percentile                                                     | 14750-27799 | 14518-26073        |                |
| Baseline CD4+ cell count (cell/mm <sup>3</sup> )                                                   |             |                    |                |
| Median                                                                                             | 290         | 150                | <.0001         |
| 25 <sup>th</sup> - 75 <sup>th</sup> percentile                                                     | 170-400     | 50-270             |                |
| Last/most recent CD4+ cell count (cell/mm <sup>3</sup> ) before the end of follow up <sup>1</sup>  |             |                    |                |
| Median                                                                                             | 355         | 140                | <.0001         |
| 25 <sup>th</sup> - 75 <sup>th</sup> percentile                                                     | 200-500     | 30-310             |                |
| Nadir CD4+ cell count (cell/mm <sup>3</sup> )                                                      |             |                    |                |
| Median                                                                                             | 170         | 50                 | <.0001         |
| 25 <sup>th</sup> - 75 <sup>th</sup> percentile                                                     | 70-290      | 10-140             |                |
| Last/most recent viral load (log <sub>10</sub> copies/ml) before the end of follow up <sup>1</sup> |             |                    |                |
| Median                                                                                             | 5           | 5                  | 0.4607         |
| 25 <sup>th</sup> - 75 <sup>th</sup> percentile                                                     | 2.69-5      | 2.69-5             |                |
| Number of years on HAART                                                                           |             |                    |                |
| Median                                                                                             | 3           | 3                  | 0.5176         |
| 25 <sup>th</sup> - 75 <sup>th</sup> percentile                                                     | 2-6         | 1-6                |                |

1. End of follow up can be the death date, last contact date, last contact date prior to moving out of BC or to participating in ARV blinded trials.

2. Median Income was calculated without 1156 missing values --17 Suicide, 211 Non-suicide and 928 all other patients.

1  
2  
3  
4  
5  
6  
7  
8  
9  
10  
11  
12  
13  
14  
15  
16  
17  
18  
19  
20  
21  
22  
23  
24  
25  
26  
27  
28  
29  
30  
31  
32  
33  
34  
35  
36  
37  
38  
39  
40  
41  
42  
43  
44  
45  
46  
47  
48  
49  
50  
51  
52  
53  
54  
55  
56  
57  
58  
59  
60

Confidential

**Table 3**

Factors associated with suicide among patients initiating HAART in the HOMER cohort who committed suicide or remained alive at the end of the study N = 4318

| Variable                                                                                 | Unadjusted HR     | P-value | Adjusted HR       |         |
|------------------------------------------------------------------------------------------|-------------------|---------|-------------------|---------|
|                                                                                          | (95% CI)          |         | (95% CI)          | P-value |
| ADI diagnosis                                                                            |                   | 0.002   |                   | 0.004   |
| Yes                                                                                      | 1.00 (-)          |         | 1.00 (-)          |         |
| No                                                                                       | 4.90(1.79, 13.39) |         | 4.45(1.62, 12.25) |         |
| History of injection drug use                                                            |                   | <0.001  |                   | <0.001  |
| No                                                                                       | 1.00 (-)          |         | 1.00 (-)          |         |
| Yes                                                                                      | 5.86(2.96, 11.60) |         | 3.95(1.99, 7.86)  |         |
| Unknown                                                                                  | 9.13(4.38, 19.03) |         | 2.59(1.21, 5.56)  |         |
| Adherence in the last year before death                                                  |                   | <0.001  | Not selected      |         |
| < 95%                                                                                    | 1.00 (-)          |         |                   |         |
| >= 95%                                                                                   | 0.16(0.10, 0.27)  |         |                   |         |
| Age at the end of follow up <sup>1</sup>                                                 | 0.93(0.90, 0.95)  | <0.001  | Not selected      |         |
| Year of the end of follow up <sup>1</sup>                                                | 0.49(0.44, 0.53)  | <0.001  | 0.49(0.45, 0.54)  | <0.001  |
| Latest CD4+ cell count (cell/mm <sup>3</sup> ) before the end of follow up <sup>1</sup>  | 0.77(0.70, 0.85)  | <0.001  | Not selected      |         |
| Latest viral load (log <sub>10</sub> copies/ml) before the end of follow up <sup>1</sup> | 3.14(2.54, 3.87)  | <0.001  | Not selected      |         |
| Efavirenz included as part of last regimen                                               |                   |         | Not selected      |         |
| No                                                                                       | 1.00 (-)          |         |                   |         |
| Yes                                                                                      | 3.01 (1.37, 6.54) | 0.005   |                   |         |

<sup>1</sup>. End of follow up can be the death date, last contact date, last contact date prior to moving out of BC or to participating in ARV blinded trials.

**Table 4**

Factors associated with suicide among patients initiating HAART who committed suicide or died other than suicide N = 993

| Variable                                                         | Unadjusted OR<br>(95% CI) | P-value | Adjusted OR<br>(95% CI) | P-value |
|------------------------------------------------------------------|---------------------------|---------|-------------------------|---------|
| ADI diagnosis                                                    |                           | <0.001  |                         | <0.001  |
| Yes                                                              | 1.00 (-)                  |         | 1.00 (-)                |         |
| No                                                               | 9.39(3.40,<br>25.88)      |         | 6.63(2.34,<br>18.83)    |         |
| History of injection drug use                                    |                           | 0.1340  |                         | 0.0230  |
| No                                                               | 1.00 (-)                  |         | 1.00 (-)                |         |
| Yes                                                              | 2.02(1.02,<br>4.14)       |         | 1.92(0.87, 4.28)        |         |
| Unknown                                                          | 1.84(0.86,<br>3.92)       |         | 0.89(0.37, 2.14)        |         |
| Age at the end of follow up <sup>1</sup>                         | 0.96(0.93,<br>0.98)       | <0.001  | 0.96(0.94, 0.99)        | 0.0060  |
| Year of the end death <sup>1</sup>                               | 0.87(0.82,<br>0.92)       | <0.001  | 0.85(0.79, 0.91)        | <0.001  |
| Nadir CD4 ever (per 100<br>cells/mm <sup>3</sup> )               | 1.71(1.47,<br>1.99)       | <0.001  | 1.23(0.97, 1.56)        | 0.0930  |
| Latest CD4 before death ever<br>(per 100 cells/mm <sup>3</sup> ) | 1.24(1.15,<br>1.34)       | <0.001  | 1.21(1.06, 1.38)        | 0.0040  |

<sup>1</sup> End of follow up can be the death date, last contact date, last contact date prior to moving out of BC or to participating in ARV blinded trials.

**Table 5:** Distribution of regimens that include specific classes of ARVS among those who remained alive or died from suicide (Panel A) and those who died from all other causes and suicide (Panel b)

| <b>Panel A</b>   |               |             |
|------------------|---------------|-------------|
| Regimen Contains | Alive         | Suicide     |
|                  | <i>N=4236</i> | <i>N=82</i> |
|                  | <i>n %</i>    |             |
| 1 NUC            | 76(2)         | 5(6)        |
| 2 NUC            | 4006(95)      | 70(85)      |
| 3 NUC            | 89(2)         | 3(4)        |
| 4 or more NUC    | 7(0.17)       | 0(0)        |
| 1 PI             | 6(0.14)       | 1(1.22)     |
| 2 PI             | 43(1.02)      | 0(0)        |
| 3 PI             | 1(0.02)       | 0(0)        |
| 1 NNR (NEV)      | 6(0.14)       | 1(1.22)     |
| 1 NNR (DMP)      | 1(0.02)       | 2(2.44)     |
| 1 IIN (MKS)      | 1(0.02)       | 0(0)        |
| T20              | -             | -           |
| Total            | 4236(98.1)    | 82(1.9)     |

  

| <b>Panel B</b>   |              |             |
|------------------|--------------|-------------|
| Regimen Contains | Non Suicide  | Alive       |
|                  | <i>N=911</i> | <i>N=82</i> |
|                  | <i>n %</i>   |             |
| 1 NUC            | 58(6.37)     | 5(6.1)      |
| 2 NUC            | 765(83.97)   | 70(85.37)   |
| 3 NUC            | 46(5.05)     | 3(3.66)     |
| 4 or more NUC    | 5(0.55)      | 0(0)        |
| 1 PI             | 12(1.32)     | 1(1.22)     |
| 2 PI             | 18(1.98)     | 0(0)        |
| 3 PI             | -            | -           |
| 1 NNR (NEV)      | 3(0.33)      | 1(1.22)     |
| 1 NNR (DMP)      | 2(0.22)      | 2(2.44)     |
| 1 IIN (MKS)      | -            | -           |
| T20              | 2(0.22)      | 0(0)        |
| Total            | 911(91.74)   | 82(8.26)    |

PI: Protease Inhibitors, NNRTI: **N**on-nucleoside reverse transcriptase inhibitor.

1  
2  
3  
4  
5  
6  
7  
8  
9  
10  
11  
12  
13  
14  
15  
16  
17  
18  
19  
20  
21  
22  
23  
24  
25  
26  
27  
28  
29  
30  
31  
32  
33  
34  
35  
36  
37  
38  
39  
40  
41  
42  
43  
44  
45  
46  
47  
48  
49  
50  
51  
52  
53  
54  
55  
56  
57  
58  
59  
60

NRTI: Nucleoside reverse transcriptase inhibitor. IIN: Integrase inhibitor. MVC: maraviroc.  
T20: Enfuvirtide

Confidential
